1 **Maintenance of variation in virulence and reproduction in populations of an**  
2 **agricultural plant pathogen**

3

4 Anik Dutta<sup>1</sup>, Daniel Croll<sup>2</sup>, Bruce A. McDonald<sup>1</sup>, and Luke G. Barrett<sup>3</sup>, \*

5

6 <sup>1</sup>Plant Pathology, Institute of Integrative Biology, ETH Zurich, Zurich, Switzerland

7 <sup>2</sup>Laboratory of Evolutionary Genetics, Institute of Biology, University of Neuchâtel,

8 Neuchâtel, Switzerland

9 <sup>3</sup>CSIRO Agriculture and Food, Canberra, Australian Capital Territory, Australia

10

11 **\*Corresponding author:** Luke G. Barrett; E-mail: [luke.barrett@csiro.au](mailto:luke.barrett@csiro.au)

12

13

14

15

16

17

18

19

20

21

22

23

24

25

26

27

28

29 **Abstract**

30 Genetic diversity within pathogen populations is critically important for predicting pathogen  
31 evolution, disease outcomes and prevalence. However, we lack a good understanding of the  
32 processes maintaining genetic variation and constraints on pathogen life-history  
33 evolution. Here, we analyzed interactions between 12 wheat host genotypes and 145 strains of  
34 *Zymoseptoria tritici* from five global populations to investigate the evolution and maintenance  
35 of variation in pathogen virulence and reproduction. We found a strong positive correlation  
36 between virulence and reproduction, with substantial variation in both traits maintained within  
37 each pathogen population. On average, highly virulent isolates exhibited higher fecundity,  
38 which might increase transmission potential in agricultural fields planted to homogeneous  
39 hosts at a high density. We further showed that pathogen strains with a narrow host range (i.e.  
40 specialists) for fecundity were on average less virulent, and those with a broader host range  
41 (i.e. generalists) for virulence were on average less fecund on a given specific host. These  
42 trade-offs costs associated with host specialization might constrain the directional evolution of  
43 virulence and fecundity. We conclude that selection favoring pathogen strains that are virulent  
44 across diverse hosts, coupled with selection that maximizes fecundity on specific hosts, may  
45 explain the maintenance of these pathogenicity traits within and among pathogen populations.

46

47 **Keywords:** *Zymoseptoria tritici*, wheat, virulence, reproduction, trade-off, host specialization.

48

## 49 **Introduction**

50 Plant pathogens typically maintain high intraspecies diversity for key pathogenic traits. These  
51 include virulence (defined here as damage caused to the host), host range, and reproduction  
52 (Lannou, 2012). Genetic variation underlying phenotypic trait variation (and corresponding  
53 resistance traits in their hosts) can be an important determinant of disease epidemiology and  
54 can have important consequences for pathogen fitness, host mortality and host reproduction.  
55 For example, genetic variation within a pathogen species can facilitate rapid adaptation to  
56 control strategies such as fungicide applications and deployment of host resistance (McDonald  
57 and Linde, 2002; Zhan *et al.*, 2005). However, despite the importance of pathogenicity traits  
58 for determining disease incidence, prevalence, and severity, we still lack a clear understanding  
59 of how they evolve within populations.

60

61 Virulence in plant pathogens can be defined as the degree of damage (e.g., necrosis) and the  
62 corresponding fitness reduction in the host following a pathogen infection (Sacristan and  
63 Garcia-Arenal, 2008; Barrett *et al.*, 2009). Virulence is (at least in part) a direct consequence  
64 of host exploitation and is therefore expected to have strong links with pathogen growth and  
65 the development of transmission stages needed to infect new hosts (i.e. fecundity). Virulence  
66 is thus a key component of pathogen life-history, influencing both the incidence and impact of  
67 disease. Populations of plant pathogens typically harbor high levels of genetic variation for  
68 both virulence and fecundity (Sacristan and Garcia-Arenal, 2008; Barrett *et al.*, 2009).  
69 Furthermore, several studies have demonstrated variable expression of these traits according  
70 to host and pathogen genetic background, their interaction, and environmental effects in  
71 different host-pathogen systems (Pagan *et al.*, 2007; Salvaudon *et al.*, 2007; Lannou, 2012;  
72 Tack *et al.*, 2012). However, despite the central importance of these traits to pathogenicity, the

73 processes underlying their evolution and the maintenance of variation within populations are  
74 not well understood.

75

76 While fecundity is an important life-history trait, pathogen fitness also critically depends upon  
77 the transmission of propagules to a new host (Antonovics, 2017). While increased pathogen  
78 fecundity can increase potential for transmission, links between virulence, fecundity and  
79 transmission are complicated by the fact that transmission also depends on the host. This  
80 complexity is captured by the so called ‘trade-off’ theory, which assumes that virulence is an  
81 unavoidable consequence of pathogen reproduction within the host (Lenski and May, 1994;  
82 Frank, 1996), and predicts that intermediate levels of virulence will maximize transmission  
83 because higher virulence may significantly reduce the life expectancy of the infected host  
84 (Anderson and May, 1982; Frank, 1996; Leggett *et al.*, 2013). However, the trade-off theory  
85 has largely been developed within the context of unmanaged host populations (e.g. humans,  
86 wild animals etc.). Here, we examine the evolution of virulence and fecundity within  
87 populations of an agricultural plant pathogen. There are some key properties specific to  
88 agroecosystems that might influence expectations for the evolution of virulence. Unlike natural  
89 systems, hosts are homogenous and planted at a high density (allowing frequent physical  
90 contact among plants), properties that potentially select for increasingly high virulence and  
91 reproduction (McDonald and Stukenbrock, 2016). In addition, farmers replace these high  
92 density, homogenous resources every year, meaning that there are potentially few negative  
93 consequences associated with increasing levels of host damage. The evolution of virulence in  
94 agroecosystems can be further influenced by the pleiotropic effect of genes affecting fungicide  
95 resistance in pathogen populations. Extensive fungicide application can impose strong  
96 directional selection for resistance, which can be positively correlated with virulence (Yang *et*  
97 *al.*, 2013). Thus, it might be predicted that in agricultural settings, directional selection may

98 result in uniformly high levels of virulence and fecundity (Walsh and Blows, 2009; Roff,  
99 2012).

100

101 Countering this prediction are frequent reports of high levels of pathogenic diversity within  
102 populations of agricultural plant pathogens (Burdon *et al.*, 2016). Trade-offs between different  
103 components of fitness are often invoked to explain the maintenance of trait variation within  
104 species (Stearns, 1989; Thrall *et al.*, 2005; Héraudet *et al.*, 2008). For host-pathogen  
105 interactions, one common prediction is that host specialization will result in the evolution of  
106 high levels of fecundity on a restricted subset of hosts (Barrett and Heil, 2012). This outcome  
107 implies the existence of trade-offs between the capacity to attack multiple hosts and another  
108 component of fitness. A broader host range (i.e. generalism) is expected to increase the number  
109 of individual hosts available to infect and lower the risk of extinction should any one host  
110 become unavailable, whereas specialization on any individual host (i.e. specialism) comes at  
111 the expense of reduced performance on other possible hosts, creating an evolutionary constraint  
112 (Kassen, 2002). This specialization trade-off is frequently used to explain why pathogenic traits  
113 do not become fixed (i.e. the trade-off maintains trait diversity) in pathogen populations  
114 (Brown, 2003). Yet, empirical evidence for costs arising from host specialization are limited  
115 (Barrett and Heil, 2012).

116

117 *Z. tritici* is the causal agent of septoria tritici blotch, a major fungal disease of wheat (Dean *et*  
118 *al.*, 2012; Fones and Gurr, 2015). The pathogen causes necrotic lesions upon infection and  
119 produces asexual fruiting bodies called pycnidia within the lesions. It undergoes several cycles  
120 of a/sexual reproduction in a growing season (Karisto *et al.*, 2018). Lesion development and  
121 pycnidia formation were shown to be two different traits, which can vary according to the  
122 particular genotypes involved in each host-pathogen interaction (Karisto *et al.*, 2018). In this

123 study, we used lesion development and pycnidia formation within lesions as proxies for  
124 pathogen virulence and reproduction, respectively. We used a set of 12 wheat host cultivars  
125 and 145 *Zymoseptoria tritici* strains to address the following questions: To what extent do key  
126 pathogenic life-history traits vary within and among populations of an agricultural plant  
127 pathogen? How do pathogen virulence and reproductive traits correlate? What is the impact of  
128 spatial structure (i.e. hosts and pathogen populations) on variation in virulence and  
129 reproduction? Is there any evidence for a trade-off between specialist and generalist strategies,  
130 and if so, what other traits are involved?

131

## 132 **Materials and Methods**

### 133 *Fungal material*

134 Five genetically different pathogen populations comprising 145 fully sequenced isolates of *Z.*  
135 *tritici* were used in this study. These field populations originated from single wheat fields  
136 located in four countries around the world (Zhan *et al.*, 2005). The field populations Australia  
137 ( $n=27$ ), Switzerland ( $n=32$ ), Israel ( $n=30$ ), and USA (Oregon.R,  $n=26$ ; Oregon.S,  $n=30$ ) were  
138 collected in 2001, 1999, 1991 and 1990, respectively. The two populations from Oregon were  
139 collected on the same day from two different wheat cultivars, Madsen (Oregon.R) and Stephens  
140 (Oregon.S), growing in the same field. All the other populations were sampled from single  
141 cultivars. The cultivars Madsen and Stephens were partially resistant and highly susceptible to  
142 STB, respectively (Cowger *et al.*, 2000). The absence of clones among these isolates and the  
143 general absence of pathogen clones within and among populations beyond spatial scales of 1  
144 m was confirmed by previous studies (Linde *et al.*, 2002; Zhan *et al.*, 2005). After collection,  
145 several copies of each isolate were stored and maintained in anhydrous silica gel or 50%  
146 glycerol at  $-80^{\circ}\text{C}$ .

### 147 *Plant material*

148 A set of 12 different wheat hosts were used in this study. This host panel included five landraces  
149 (Chinese Spring, 1011, 1204, 4391 and 5254), six commercial varieties (Drifter, Gene, Greina,  
150 Runal, Titlis, Toronit) and a back-cross line (ArinaLr34). The 1011, 1204, 4391, and 5254  
151 landraces were selected from a collection of 199 Swiss wheat landraces from the Swiss national  
152 gene bank ([www.bdn.ch](http://www.bdn.ch)). This panel was screened for resistance to STB (unpublished results)  
153 using four fully sequenced *Z. tritici* isolates, namely 3D1, 3D7, 1E4 and 1A5 (Lendenmann *et*  
154 *al.*, 2014; Croll *et al.*, 2013). The landraces 1011 and 4391 were highly resistant and  
155 susceptible, respectively, to all four isolates. The landraces 1204 and 5254 were moderately  
156 susceptible to the four isolates. The remaining hosts have diverse genetic backgrounds and  
157 were previously used to identify infectivity (i.e. a/virulence) factors in *Z. tritici* (Hartmann *et*  
158 *al.*, 2017; Zhong *et al.*, 2017; Meile *et al.*, 2018; Stewart *et al.*, 2018). The seeds of Gene and  
159 ArinaLr34 were provided by Christopher Mundt (Oregon State University) and Simon  
160 Krattinger (KAUST), respectively. The seeds of other hosts were obtained from DSP Ltd.  
161 (Delley, Switzerland).

162

### 163 *Preparation of fungal inoculum*

164 The isolates were regenerated from long term glycerol storage by adding 40µl of concentrated  
165 spore suspension into 100 ml Erlenmeyer flasks containing 50ml of yeast sucrose broth (YSB,  
166 10 g/L sucrose, 10 g/L yeast extract amended with 50 µg/ml kanamycin sulfate to control other  
167 microbial growth). The flasks were kept at 18°C on a continuous shaker at 120 rpm to produce  
168 blastospores. Blastospores were harvested after 4-7 days of growth by filtering the liquid media  
169 through two layers of sterile cheesecloth. Blastospore pellets were collected by centrifugation  
170 (1575 g, 15 minutes, 4°C), washed with sterile water to eliminate any residual growth media  
171 and re-suspended in sterile water for subsequent procedures. The spores were counted and  
172 adjusted to a final concentration of 5×10<sup>6</sup> spores/ml using KOVA counting slides (Hycor

173 Biomedical, Inc., Garden Grove, CA, USA). The spore suspension of each isolate was stored  
174 at -20°C until inoculation for between 1-21 days.

175

176 *Phenotyping and data collection*

177 Due to greenhouse space limitations, the whole experiment was divided into two phases  
178 consisting of a combination of 6 hosts × 145 isolates in each phase. Three seeds of each host  
179 were sown in an individual square pot filled with peat substrate Jiffy GO PP7 (Jiffy Products  
180 International, Moerdijk, the Netherlands). Six pots were placed on a tray in a 2×3 array. All the  
181 trays were kept in a greenhouse at 22°C (day) and 18°C (night) with 70% relative humidity  
182 (RH) and 16-h photoperiod. Plants were inoculated after developing a fully expanded second  
183 leaf, at 14 days after sowing. The third leaf and subsequent leaves were trimmed before  
184 inoculation and new leaves were trimmed until data collection to facilitate a more uniform  
185 distribution of spores and better light penetration onto the inoculated leaf. Before the  
186 inoculation day, the spore suspension of each isolate was thawed on ice and kept at 4°C  
187 overnight. The final volume of each spore suspension used for inoculation was adjusted to 20  
188 ml by adding sterile water supplemented with 0.1% of the Tween 20 surfactant. Each tray  
189 containing six hosts was inoculated with an airbrush spray gun (1A Profi Handels GmbH,  
190 Wiesbaden, Germany) uniformly until run-off. The spraying was done in a confined area to  
191 minimize any chance of cross-contamination. The trays were covered with plastic bags after  
192 inoculation to provide 100% RH and transferred into a greenhouse chamber. The entire  
193 procedure was repeated three times over three consecutive weeks to generate three independent  
194 biological replicates for both phases of the experiment. Spraying of all 145 isolates was  
195 performed on a single day. For the landraces 1011, 5254 and 1204, 4391, only one and two  
196 plants, respectively, were inoculated in each replicate due to limited seed availability.

197



198 Plastic bags were removed three days post-inoculation (dpi). Environmental conditions  
199 otherwise remained identical. To facilitate comparisons among hosts, leaves were harvested  
200 between 19-26 dpi because different hosts developed symptoms at different rates. All leaves  
201 from each host×isolate combination were collected on the same day. Each second leaf was  
202 excised and mounted on A4 paper for scanning as described previously (Karisto *et al.*, 2018).  
203 Each A4 sheet containing eight inoculated leaves was scanned using a flatbed scanner  
204 (CanoScan LiDE 220) for automated image analysis (AIA; Karisto *et al.*, 2018). The AIA  
205 provided quantitative data on the amount of lesion area caused by the fungus and pycnidia  
206 density within the lesions on each leaf. As previously described in Karisto *et al.*, (2018), lesion  
207 area corresponds to host damage and was used as a proxy for virulence, whereas pycnidia  
208 density is a direct measure of pathogen asexual reproduction as pycnidia produce the spores  
209 that are eventually transmitted through rain splash or direct contact to neighboring plants.

210

#### 211 *Data analysis*

212 Before analysis, all phenotypic values were log-transformed to fulfill the normality  
213 assumptions of ANOVA based on the residual distribution. The log-transformed values were  
214 used for all analyses. A combined analysis of variance (ANOVA) was performed to estimate  
215 the effect of different factors on the two traits. The following linear model was implemented  
216 using the *lm()* function from the package lme4 (Bates *et al.*, 2014) in R (R core team, 2019):

217 *Virulence/Reproduction*~*Host+Population+Isolate:Population+Host:Population+*

218 *Host:Isolate:Population+Replication+Error*

219 All factors were treated as fixed effects and isolates were nested within each population. The  
220 least-square mean (LSmean) for each host×isolate combination was extracted by using the  
221 function “emmeans” from the package emmeans (Lenth, 2018). Using the LSmean from each  
222 host, we computed the global mean for each isolate for virulence and reproduction. Posthoc

223 multiple comparisons of LSmeans of the host and pathogen population interactions were  
224 performed by using Tukey's HSD test at the  $\alpha=0.05$  significance level.

225

226 We used the coefficient of variation (CV = standard deviation/mean) of LSmeans for each  
227 isolate among 12 hosts as a metric for host specificity (Poissot *et al.*, 2012; Caseys *et al.*, 2019).  
228 Several methods including CV have been proposed for measuring specificity at both individual  
229 and species levels (Bolnic *et al.*, 2002; Poissot *et al.*, 2012). However, each of these has  
230 limitations depending on the type of data. While the majority of the specificity metrics assume  
231 discrete data, very few are available for continuous data. In our dataset, the use of host  
232 resources was more evenly distributed. The majority of isolates readily infected the majority  
233 of susceptible hosts, while the degree of virulence and the amount of reproduction varied  
234 among the majority of them. Hence we favored the use of CV, which facilitates estimation of  
235 the degree of specialism and generalism among the isolates using precise quantitative  
236 phenotypic data.

237

238 To test for trade-offs, we performed Pearson's correlation analysis between virulence and  
239 reproduction, using the overall mean across 12 hosts. Furthermore, we tested the shape of the  
240 correlation curve by fitting a polynomial model (*Reproduction~poly (Virulence, 2)*). We were  
241 interested in determining how the specificity of each isolate affects its mean virulence and  
242 reproduction. Therefore, we performed correlations between mean virulence and the specificity  
243 of reproduction as well as between mean reproduction and the specificity of virulence. All  
244 analyses were performed in R-studio.

## 245 **Results**

246 *Determinants of quantitative variation in pathogen virulence and reproduction*

247 We obtained quantitative data from 11'019 inoculated leaves generated from the interactions  
248 between 12 hosts and 145 pathogen strains using AIA to investigate how variation in pathogen  
249 life-history traits are maintained. Lesion area and pycnidia density within the lesion area were  
250 used as proxies of virulence and reproduction, respectively. Isolates displayed a wide range of  
251 phenotypic responses, exhibiting a quantitative distribution in virulence and reproduction on  
252 each host (Supplemental figs. 1A and 1B). Using the non-transformed data, virulence ranged  
253 from 0 to 100% with an overall mean of  $61.4 \pm 0.4\%$ . The host 1011 showed the highest  
254 resistance on average, followed by Gene and Toronit (Supplemental Table 1). Mean  
255 reproduction across 12 hosts ranged from 0 to 671 pycnidia per cm<sup>2</sup> of lesion with an overall  
256 mean of  $17.8 \pm 0.4$ . The isolates were on average highly virulent and fecund on the most  
257 susceptible host 4391.

258

259 We applied a linear model to test which factors contributed to the observed quantitative  
260 variation in virulence and reproduction. There was significant variation ( $P < 2e-16$ ) among the  
261 hosts, populations, and isolates for both the traits (Table 1). Host identity strongly influenced  
262 the observed variation in reproduction ( $F = 835.53$ ,  $P < 2e-16$ ) and virulence ( $F = 232.47$ ,  $P <$   
263  $2e-16$ ). We obtained a highly significant interaction effect between hosts and isolates nested  
264 within each population for virulence ( $F = 2.11$ ,  $P < 2e-16$ ) and reproduction ( $F = 2.68$ ,  $P < 2e-$   
265  $16$ ). This significant interaction effect indicates the occurrence of host specificity among the  
266 isolates for both traits. Multiple comparisons among the populations on each host revealed high  
267 variability and changes in ranking among the populations for both traits (Figs. 1A and 1B). The  
268 two populations from Oregon had the highest overall mean virulence. The Israeli population  
269 exhibited the highest reproduction, followed by Oregon.R and Switzerland.

270

271 **Table 1.** Analysis of Variance (ANOVA) showing the effects of hosts, populations, isolates  
 272 and the respective interactions on virulence (amount of necrotic lesion area) and  
 273 reproduction (pycnidia density within lesions) among 145 *Zymoseptoria tritici*  
 274 isolates from five populations across 12 hosts.

| Sources of variation    | Virulence |         |         |            | Reproduction |         |            |
|-------------------------|-----------|---------|---------|------------|--------------|---------|------------|
|                         | DF        | SS      | F-value | P-value    | SS           | F-value | P-value    |
| Population              | 4         | 77.36   | 105.42  | <2e-16***  | 98.19        | 168.16  | <2e-16***  |
| Population:Isolate      | 140       | 329.50  | 12.83   | <2e-16***  | 275.80       | 13.49   | <2e-16***  |
| Host                    | 11        | 469.08  | 232.47  | <2e-16***  | 1341.63      | 835.53  | <2e-16***  |
| Host:Population         | 44        | 171.96  | 21.30   | <2e-16***  | 387.13       | 60.27   | <2e-16***  |
| Host:Population:Isolate | 1540      | 596.08  | 2.11    | <2e-16***  | 603.40       | 2.68    | <2e-16***  |
| Replication             | 2         | 8.07    | 22.00   | 6.7e-16*** | 4.16         | 14.23   | 6.7e-16*** |
| Error                   | 9277      | 1701.74 |         |            | 1354.21      |         |            |

275 \*\*\* indicates significance level at 0.01%; DF= degrees of freedom; SS=Sum of square

276

277

278

279

280

281

282

283

284

285

286

287

288

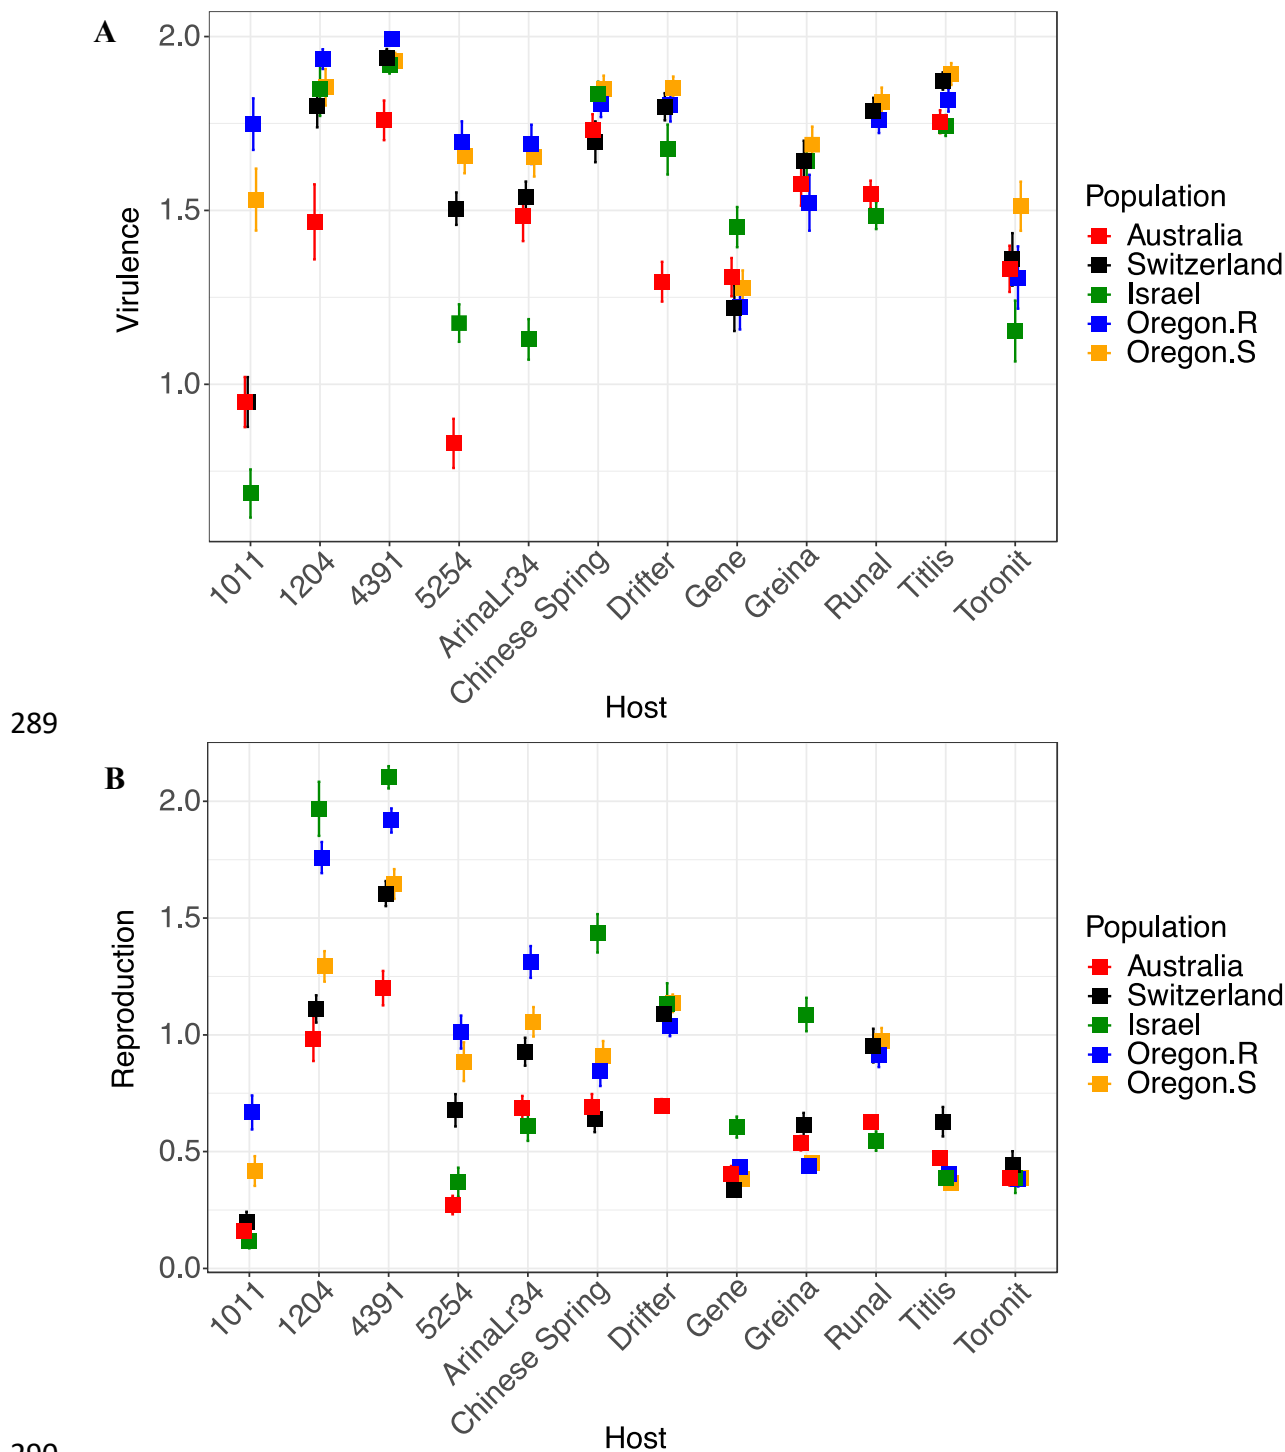

**Figure 1.** Multiple comparisons for (A) virulence (amount of necrotic lesion area) and (B) reproduction (pycnidia density within lesions) among the five *Zymoseptoria tritici* populations on 12 wheat hosts. Data were log-transformed.

297 *Absence of a trade-off between pathogen virulence and reproduction*

298 We performed Pearson's correlation between virulence and reproduction to determine whether  
299 or not there is a trade-off between these traits. The overall mean values of each isolate across  
300 12 hosts were used in this analysis. Overall, we detected a significant positive correlation ( $r =$   
301  $0.62$ ,  $P < 2.2e-16$ ; Fig. 2A) between the two traits. This indicates that highly virulent isolates  
302 also had high levels of fecundity. However, the polynomial regression did not show evidence  
303 for any saturating point (results not shown) on the curve, indicating an increasing trend for both  
304 traits. The positive correlation was consistent within each population, although the strength of  
305 the correlation within each population varied considerably, with the ISR population showing  
306 the highest correlation coefficient ( $r = 0.49$  to  $0.85$ ,  $P = 0.0045$  to  $3.5e-09$ ; Fig. 2B). The  
307 variation in the correlation indicated that individual isolates might differ in their strategy to  
308 exploit certain hosts.

309

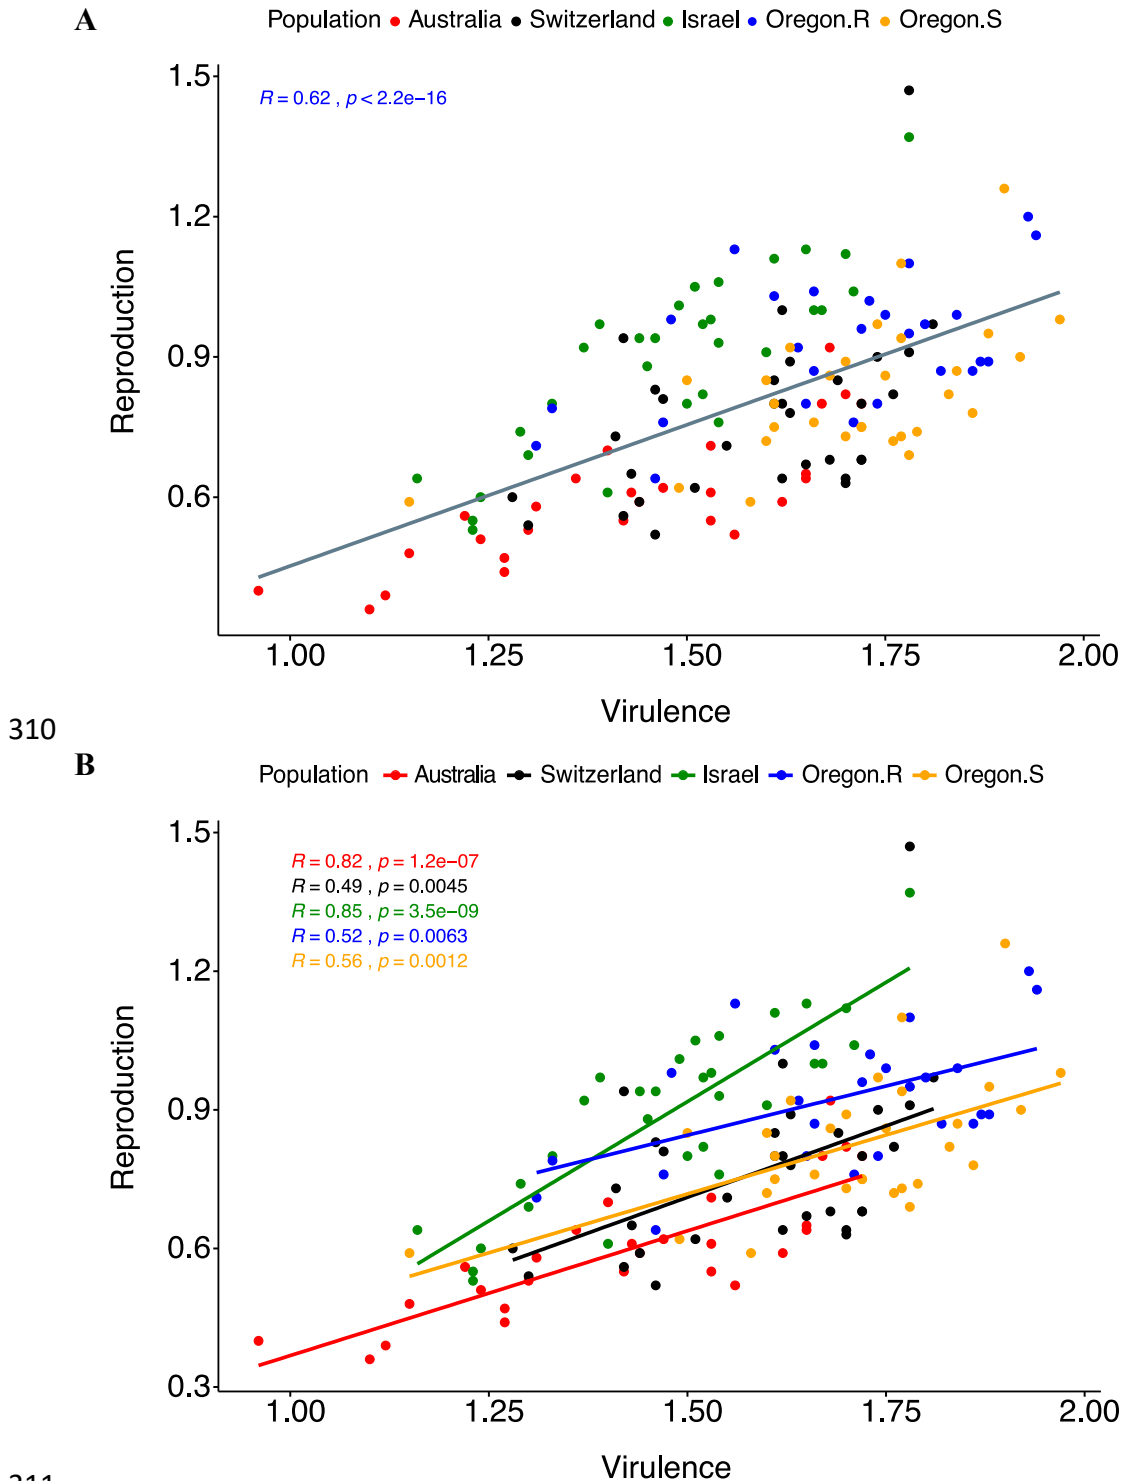

311  
312 **Figure 2.** Correlation between virulence (amount of necrotic lesion area) and reproduction  
313 (pycnidia density within lesions; A) overall and (B) within each population, among  
314 145 *Zymoseptoria tritici* isolates from five populations. Each point represents the  
315 overall.

316

317

318 *Host specialization reduces the mean trait performance*

319 We investigated the influence of host specialization on the overall virulence and reproduction  
320 and the maintenance of genetic diversity in the field. Using CV as a specificity metric, we  
321 detected a significant negative correlation ( $r = -0.60$ ,  $P = 8.5e-16$ , Fig. 3A) between  
322 specialization for reproduction and mean virulence. This pattern indicates that isolates that are  
323 generalists for reproduction have higher mean virulence across the 12 hosts. We also found a  
324 significant negative correlation ( $r = -0.42$ ,  $P = 1.3e-07$ , Fig. 3B) between specialization for  
325 virulence and mean reproduction, indicating that isolates that exhibit host specialization for  
326 virulence have an overall lower rate of reproduction across the 12 hosts. It is evident that most  
327 of the isolates from the populations in Oregon and Israel are generalists or specialists,  
328 respectively, for both traits (Figs. 3A & 3B). Importantly, the positive correlation ( $r = 0.46$ ,  $P$   
329  $= 6.8e-09$ , Fig. 4) between specialization for reproduction and maximum reproduction indicate  
330 that there is a benefit associated with being a specialist.

331

332

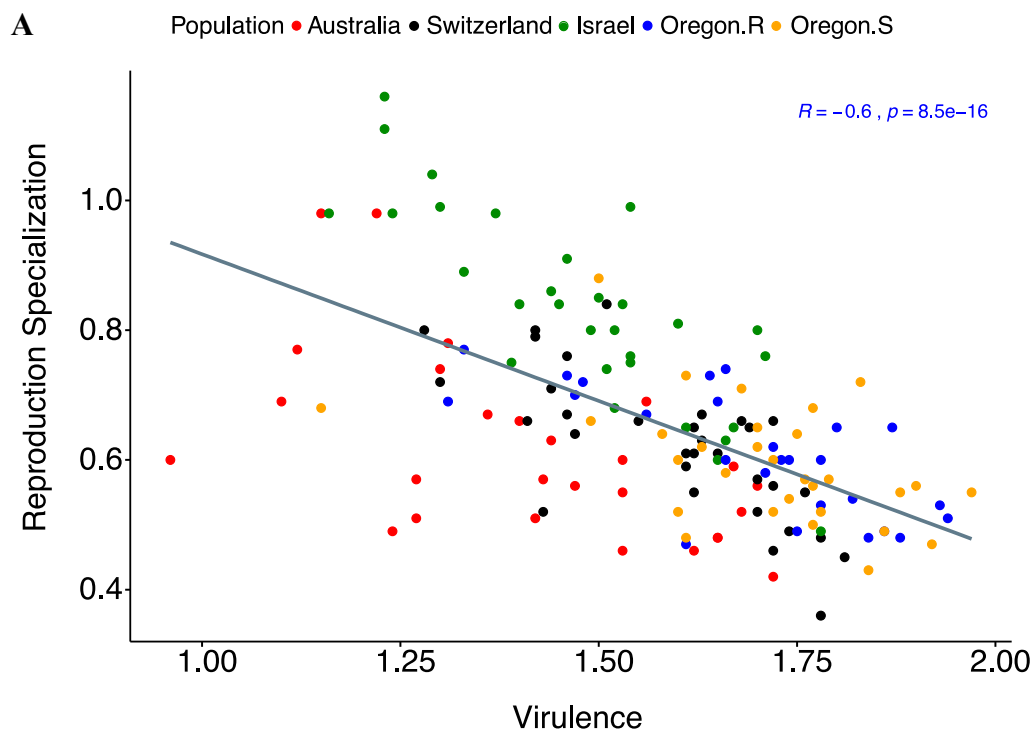

333



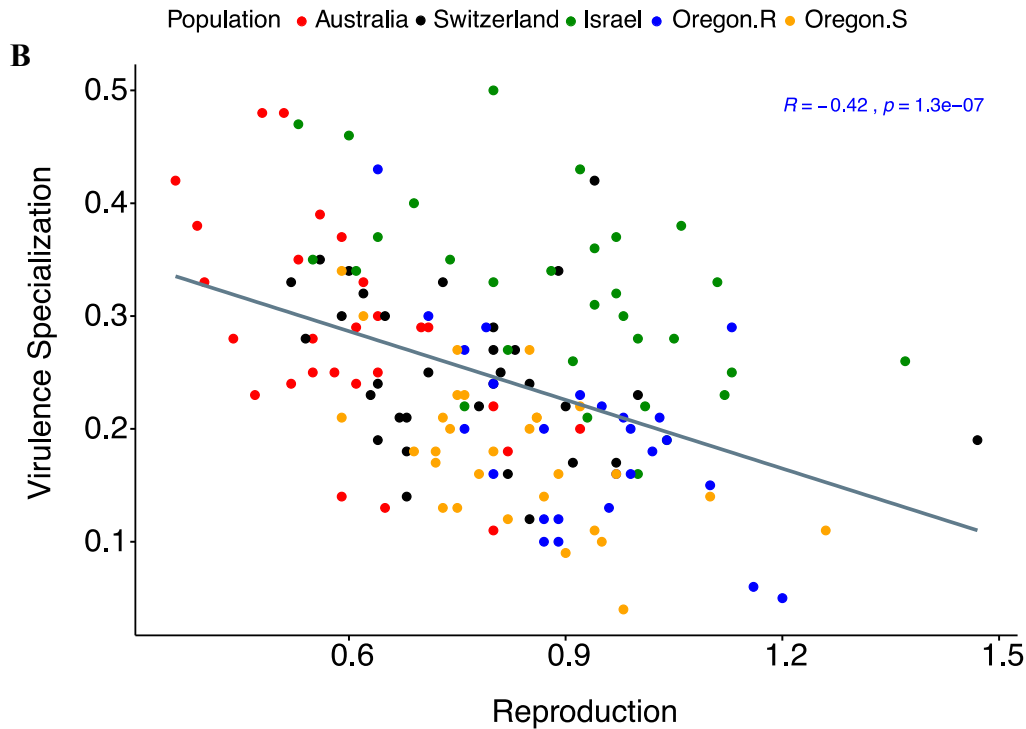

334  
335 **Figure 3.** Correlation between (A) overall mean virulence (amount of necrotic lesion area)  
336 and reproduction specialization, (B) overall reproduction (pycnidia density within  
337 lesions) and virulence specialization among 145 *Zymoseptoria tritici* isolates from five  
338 populations. Specialization represents the estimates of coefficient of variation of  
339 means across 12 hosts for each trait. Higher specialization indicates preference for  
340 specific hosts to maximize trait performance. Data were log-transformed.

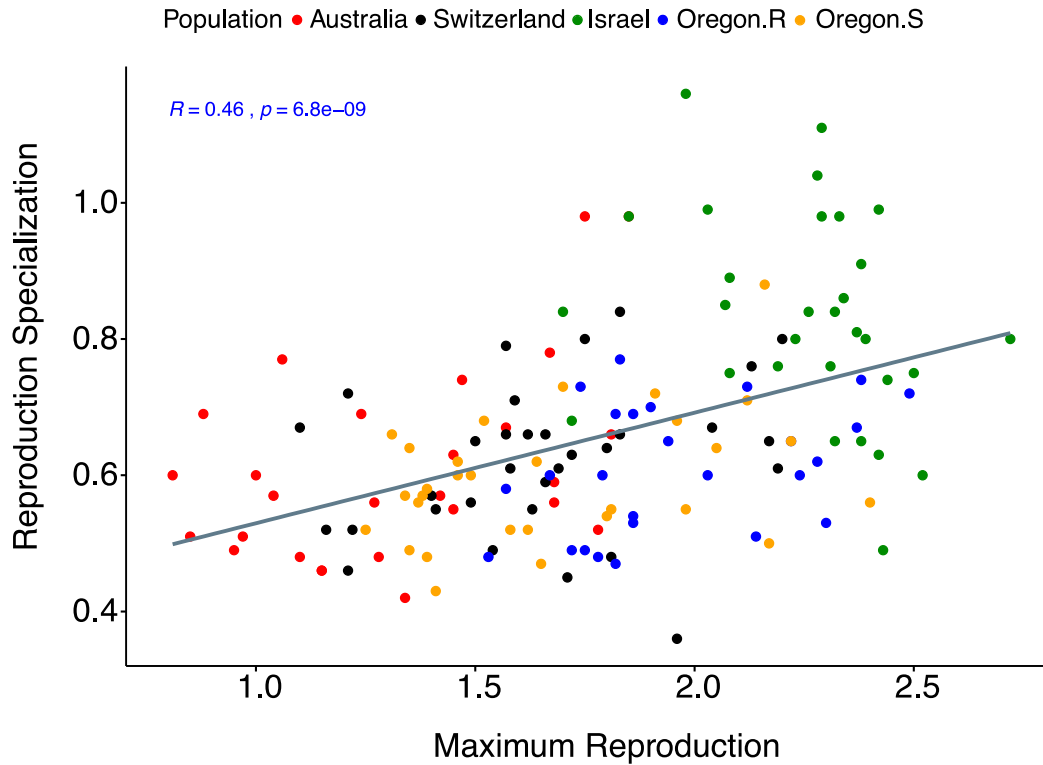

341

342 **Figure 4.** Correlation between maximum reproduction (maximum pycnidia density within  
343 the lesion area produced by each isolate across 12 hosts) and reproduction  
344 specialization (measured as the coefficient of variation of means for pycnidia density  
345 within lesions across 12 hosts) among 145 *Zymoseptoria tritici* isolates from five  
346 populations. Data were log-transformed.

347

348

349

350

351

352

353

354

355

356

357

## 358 **Discussion**

359 Understanding the processes that maintain the variation in pathogenicity is of central  
360 importance to predict pathogen evolution and understand disease dynamics (Burdon and Thrall,  
361 2008). Using a panel of 12 diverse hosts and 145 pathogen strains, we demonstrated that  
362 individual estimates of virulence and reproduction varied quantitatively, and that host genotype  
363 and interactions with pathogen genotype are major contributors to the observed variation in  
364 virulence and reproduction. We observed a strong positive correlation between the two traits  
365 with substantial variation within each population. Furthermore, the data show a continuum of  
366 host specialization among *Z. tritici* isolates, where isolates ranged between high and low  
367 fecundity depending on the specific host infected. This may constrain directional evolution of  
368 both virulence and fecundity and contribute to the maintenance of trait variation.

369

### 370 *Host diversity as a key determinant of pathogenicity trait variation*

371 Infection outcomes in many pathosystems are determined by genetic interactions among hosts  
372 and pathogens (e.g. Pagan *et al.*, 2007; Pariaud *et al.*, 2009; Lannou, 2012; Tack *et al.*, 2012).  
373 Earlier models of pathogen evolution often assumed that variation in infectivity is solely  
374 controlled by pathogen strains (Restif and Koella, 2003). Here, in addition to the significant  
375 host-isolate interactions, the effect of host cultivar on reproduction was almost 3-fold higher  
376 than that observed for virulence, indicating that host genetic background strongly influences  
377 resource allocation for reproduction following pathogen colonization (Vale *et al.*, 2011;  
378 Attisano *et al.*, 2012). This result is consistent with previous studies, which show that even  
379 after successful infection, host immune response, nutrient availability, and quantitative  
380 resistance may hamper pathogen reproduction (Karisto *et al.*, 2018). The high level of  
381 dependency on host genotype for reproductive fitness is consistent with results demonstrating  
382 that different isolates maximize reproductive fitness on specific hosts and that host specific

383 patterns of fecundity are potentially important for the maintenance of pathogen diversity (see  
384 discussion below).

385

386 *Evolution of pathogen virulence and fecundity in agroecosystems*

387 Here we show that highly virulent isolates of *Z. tritici* on average exhibit greater reproductive  
388 potential. This likely reflects general links between pathogen induced necrosis and nutrient  
389 release in this system (Zhan *et al.*, 2005; Kelm *et al.*, 2012). We did not detect any evidence  
390 for a saturation point on the correlation curve generated from our dataset, suggesting that both  
391 traits follow a continuous range. On a susceptible host, high levels of fecundity and virulence  
392 are likely to be advantageous because highly virulent isolates can outcompete co-infecting  
393 strains (Zhan *et al.*, 2015; McDonald and Stukenbrock, 2016). However, despite this seeming  
394 advantage, highly virulent and fecund isolates did not dominate any population. Rather, we  
395 observed that considerable variation for both virulence and fecundity is maintained within field  
396 populations.

397

398 Trade-offs between transmission and virulence have been predicted to contribute to the  
399 maintenance of variation for virulence. This reflects the assumption that increased virulence  
400 decreases the longevity of the infected host so that the transmission period decreases, creating  
401 a trade-off (Ebert and Bull, 2003; de Roode *et al.*, 2008). In this agricultural ecosystem  
402 (characterized by high density monocropping with relatively homogeneous hosts), higher  
403 reproduction (and higher virulence) may be predicted to increase transmission potential as the  
404 reproductive units (pycnidia) contain spores that are dispersed by rain-splash throughout the  
405 field, and hosts are replaced by farmers each growing season. However, it should be noted that  
406 although fecundity can influence transmission, they are not synonymous. Under natural field  
407 conditions, transmission depends on other factors such as the quantity, viability, and infection

408 efficiency of spores, as well as climatic conditions and, most importantly, the availability of a  
409 susceptible host. How these traits and outcomes interact to determine virulence evolution is not  
410 well understood.

411

412 We found considerable variation among populations in overall levels of virulence and  
413 reproduction on a diverse set of hosts. We also found a strong correlation between these traits  
414 within populations. These results suggest that selection for these traits can differ among  
415 populations. One possible explanation for these findings is that the differential patterns of  
416 virulence and reproduction reflect specific patterns of adaptation to the most common host  
417 genotypes planted in the different wheat fields from which these pathogens were sampled.  
418 However, the Swiss population displayed relatively low levels of virulence and fecundity,  
419 which was surprising considering that the bulk of the tested hosts originated from Swiss  
420 breeding programs. It is possible that the intensive breeding for STB resistance and frequent  
421 introductions of new varieties from neighboring countries (Fossati and Brabant, 2003; Brabant  
422 *et al.*, 2006) in Switzerland may have hampered selection for higher trait performance and  
423 adaptation to a specific host. Thus, imposing diversifying selection on local pathogen  
424 populations by recurrent changing of wheat cultivars and specific resistance traits might be a  
425 useful strategy to disrupt evolution towards increased virulence and fecundity (Burdon *et al.*,  
426 2014). Furthermore, in addition to quantitative resistance to *Z. tritici* (Yates *et al.*, 2019), wheat  
427 varieties across the world often share common major resistance genes (Brown *et al.*, 2015),  
428 which can be overcome by convergent evolution generating similar virulent mutations  
429 independently in different geographical populations, even in the absence of gene flow among  
430 populations (Croll and McDonald, 2017). These processes could explain the observed higher  
431 performance of the Israeli and Oregon populations on Swiss hosts.

432

433 *Role of host specialization in the evolution of pathogenicity trait variation*

434 Does host specialization limit the emergence of “super-pathogen” strains combining higher  
435 virulence, higher fecundity, and a broader host range? Here, all the hosts exhibited a wide  
436 spectrum of resistance and susceptibility towards pathogen virulence and reproduction. For  
437 example, the wheat genotypes 1011, Gene and Toronit showed greater resistance to virulence  
438 and suppressed reproduction of some isolates, while other wheat genotypes were moderately  
439 to highly susceptible to virulence and enabled higher reproduction of some isolates. Therefore,  
440 we assessed patterns of host specificity by examining patterns of quantitative variation for  
441 virulence and reproduction among the many host-isolate interactions in our experiment. We  
442 found significant negative correlations between overall virulence and reproduction specificity,  
443 indicating that isolates with high host specificity for reproduction (i.e. higher pycnidia  
444 production on some hosts and a smaller number of pycnidia on other hosts) were on average  
445 less virulent across all hosts (i.e. produced a lower average lesion area). This observation is  
446 consistent with the hypothesis that increased specificity for fecundity results in decreased  
447 virulence (Kirchner and Roy, 2002). This pattern further indicates a cost associated with host  
448 specialization, which is suggested to result from antagonistic pleiotropy or non-overlapping  
449 loci controlling trait performance on different hosts (Kawecki, 1994; Legros and Koella, 2010;  
450 Hartmann *et al.*, 2017).

451

452 The observed positive relationship between specialization for reproduction and maximum  
453 reproduction suggests that isolates following a generalist strategy fail to maximize their  
454 reproductive fitness on a specific host, thus invoking the principle of “jack of all trades-master  
455 of none” (Remold, 2012). This trade-off could explain why specialist isolates are maintained  
456 within populations and why ‘super-pathogen’ strains do not dominate (Kassen, 2002). This is  
457 consistent with the results reported by Thrall and Burdon (2003), where generalist isolates with

458 a broader host range had lower overall fecundity. Such specificity for reproduction may be  
459 advantageous under scenarios involving host heterogeneity, competition during multiple  
460 infection, and disruptive selection (Jaenike, 1990; Barrett *et al.*, 2009).

461

462 The precise scenario(s) generating heterogeneity, disruptive selection and promoting the  
463 maintenance of variation for host specialization within and among populations remain  
464 unknown. Specialists could outperform generalists on a given host (Garamszegi, 2006; Romero  
465 and Elena, 2008) because generalists suffer from unequal selection pressure imposed by  
466 different hosts (González *et al.*, 2019). For example, in a wheat field planted to a susceptible  
467 cultivar (typically grown in a monoculture), being highly specialized in reproduction could be  
468 beneficial because competition among isolates can favour selection for higher reproduction  
469 instead of broader host range. In contrast, strains with high average levels of fecundity across  
470 different host genotypes may be expected to have an advantage in environments with higher  
471 levels of host genetic heterogeneity (May and Anderson, 1983; Frank, 1996). For example, in  
472 areas where multiple cultivars are planted in relatively close proximity, generalist pathotypes  
473 may have an advantage. Indeed, the maintenance of variation may reflect conflicts between  
474 selection for fecundity and transmission within fields planted to a single susceptible cultivar  
475 and selection for ability to infect multiple cultivars planted across an agricultural landscape. In  
476 our case, whether the diversity of wheat host genotypes present within agricultural landscapes  
477 is alone sufficient to explain the maintenance of generalist pathotypes given the presumed  
478 advantage to specialists remains an interesting but open question.

479

## 480 **Conclusion**

481 Here, we report how different processes regulate life-history trait variation, which ultimately  
482 improves our understanding of pathogen evolution and disease dynamics. Host diversity and

483 differential quantitative interactions with pathogen strains are likely key determinants of  
484 variation in virulence and reproduction. Trade-offs for reproduction encountered by specialist  
485 vs generalist isolates reinforce the general importance of costs in maintaining pathogenicity  
486 trait variation. These mechanisms prevent the fixation of super-pathogen strains in pathogen  
487 populations while indicating that diversifying the host in agricultural fields might be a useful  
488 strategy to decelerate virulence evolution. Many approaches can be used to introduce dynamic  
489 diversity into agricultural ecosystems and reduce selection for increased virulence (McDonald,  
490 2014). A low tech approach that was shown in independent, replicated, field experiments to  
491 impose diversifying selection on populations of three cereal pathogens is growing cultivar  
492 mixtures (Zhan and McDonald, 2013). Implementing such dynamic diversity at the field scale  
493 may impose such trade-offs on generalist isolates that lowers the ability to maximize  
494 reproduction on any particular host (McDonald, 2014). We conclude that context-dependent  
495 selective forces operating on pathogen populations located in different geographic locations  
496 will likely play an ongoing role in contributing to the maintenance of variation in virulence and  
497 reproduction in this and other pathosystems. While increased reproduction is likely to provide  
498 more opportunities for transmission and virulence evolution in the environments that typify  
499 much of modern agriculture, we still lack a deeper understanding of the impact of other life-  
500 history traits that have an impact on epidemiology and disease dynamics, such as latent period,  
501 spore quantity and infection efficiency.

502

### 503 **Data availability**

504 Raw data used for this study are available at: <https://doi.org/10.5061/dryad.j3tx95x9m>.

505

### 506 **Author contributions**



507 LGB conceived the idea of the research. AD conducted the experiment, collected, and analyzed  
508 the phenotypic data, wrote the manuscript with LGB. BAM and DC provided funding and  
509 corrected the manuscript. All authors approved the final version of the manuscript.

510

## 511 **Acknowledgments**

512 This work was supported by the Swiss Federal Office for Agriculture (BLW) in the framework  
513 of NAP-PGREL (national plan of action for the conservation and sustainable utilization of  
514 plant genetic resources) Project Nr. 627000640. Peter Thrall read an earlier version and made  
515 useful comments and suggestions that improved the manuscript.

516

517

518

519

520

521

522

523

524

525

526

527

528

529

530

531

532

533

534

535

536

537

538 **References**

- 539 Anderson, R. M., & May, R. M. (1982). Coevolution of hosts and parasites. *Parasitology*,  
540 85(2), 411-426.
- 541 Antonovics, J. (2017). Transmission dynamics: critical questions and challenges. *Philosophical*  
542 *Transactions of the Royal Society B: Biological Sciences*, 372(1719), 20160087.
- 543 Attisano, A., Moore, A. J., & Moore, P. J. (2012). Reproduction-longevity trade-offs reflect  
544 diet, not adaptation. *Journal of Evolutionary Biology*, 25(5), 873-880.
- 545 Barrett, L. G., & Heil, M. (2012). Unifying concepts and mechanisms in the specificity of  
546 plant–enemy interactions. *Trends in plant science*, 17(5), 282-292.
- 547 Barrett, L. G., Kniskern, J. M., Bodenhausen, N., Zhang, W., & Bergelson, J. (2009). Continua  
548 of specificity and virulence in plant host–pathogen interactions: causes and  
549 consequences. *New Phytologist*, 183(3), 513-529.
- 550 Bates, D., Maechler, M., Bolker, B., & Walker, S. (2015). lme4: Linear mixed-effects models  
551 using Eigen and S4. R package version 1.1–7. 2014.
- 552 Bolnick, D. I., Yang, L. H., Fordyce, J. A., Davis, J. M., & Svanbäck, R. (2002). Measuring  
553 individual-level resource specialization. *Ecology*, 83(10), 2936-2941.
- 554 Brabant, C., Fossati, D., & Kleijer, G. (2006). Selection of spring wheat in Switzerland (La  
555 sélection du blé de printemps en Suisse). *Revue suisse Agric*, 38(2), 73-80.
- 556 Brown, J. K. M. (2003). Little else but parasites. *Science*, 299(5613), 1680-1681.
- 557 Brown, J. K., Chartrain, L., Lasserre-Zuber, P., & Saintenac, C. (2015). Genetics of resistance  
558 to *Zymoseptoria tritici* and applications to wheat breeding. *Fungal Genetics and*  
559 *Biology*, 79, 33-41.
- 560 Burdon, J. J., & Thrall, P. H. (2008). Pathogen evolution across the agro-ecological interface:  
561 implications for disease management. *Evolutionary Applications*, 1(1), 57-65.
- 562 Burdon, J. J., Barrett, L. G., Rebetzke, G., & Thrall, P. H. (2014). Guiding deployment of  
563 resistance in cereals using evolutionary principles. *Evolutionary Applications*, 7(6),  
564 609-624.
- 565 Burdon, J. J., Zhan, J., Barrett, L. G., Papaïx, J., & Thrall, P. H. (2016). Addressing the  
566 challenges of pathogen evolution on the world's arable  
567 crops. *Phytopathology*, 106(10), 1117-1127.
- 568 Caseys, C., Shi, G., Soltis, N., Gwinner, R., Corwin, J., Atwell, S., & Kliebenstein, D. (2020).  
569 Quantitative interactions drive *Botrytis cinerea* disease outcome across the plant  
570 kingdom. *bioRxiv*, 507491.

- 571 Cowger, C., Hoffer, M. E., & Mundt, C. C. (2000). Specific adaptation by *Mycosphaerella*  
572 *graminicola* to a resistant wheat cultivar. *Plant pathology*, *49*(4), 445-451.
- 573 Croll, D., & McDonald, B. A. (2017). The genetic basis of local adaptation for pathogenic  
574 fungi in agricultural ecosystems. *Molecular ecology*, *26*(7), 2027-2040.
- 575 Croll, D., Zala, M., & McDonald, B. A. (2013). Breakage-fusion-bridge cycles and large  
576 insertions contribute to the rapid evolution of accessory chromosomes in a fungal  
577 pathogen. *PLoS Genetics*, *9*(6).
- 578 Dean, R., Van Kan, J. A., Pretorius, Z. A., Hammond-Kosack, K. E., Di Pietro, A., Spanu, P.  
579 D., ... & Foster, G. D. (2012). The Top 10 fungal pathogens in molecular plant  
580 pathology. *Molecular plant pathology*, *13*(4), 414-430.
- 581 Ebert, D., & Bull, J. J. (2003). Challenging the trade-off model for the evolution of virulence:  
582 is virulence management feasible?. *Trends in microbiology*, *11*(1), 15-20.
- 583 Fones, H., & Gurr, S. (2015). The impact of Septoria tritici Blotch disease on wheat: An EU  
584 perspective. *Fungal Genetics and Biology*, *79*, 3-7.
- 585 Fossati, D., & Brabant, C. (2003). Selection of wheat in Switzerland: the federal stations'  
586 programme (La selection du ble en Suisse: le programme des stations federales.). *Revue*  
587 *Suisse d'agriculture*, *35*(4), 169-180.
- 588 Frank, S. A. (1996). Models of parasite virulence. *The Quarterly review of biology*, *71*(1), 37-  
589 78.
- 590 Garamszegi, L. Z. (2006). The evolution of virulence and host specialization in malaria  
591 parasites of primates. *Ecology letters*, *9*(8), 933-940.
- 592 González, R., Butković, A., & Elena, S. F. (2019). Role of host genetic diversity for  
593 susceptibility-to-infection in the evolution of virulence of a plant virus. *Virus*  
594 *evolution*, *5*(2), vez024.
- 595 Hartmann, F. E., Sánchez-Vallet, A., McDonald, B. A., & Croll, D. (2017). A fungal wheat  
596 pathogen evolved host specialization by extensive chromosomal rearrangements. *The*  
597 *ISME journal*, *11*(5), 1189-1204.
- 598 Héraudet, V., Salvaudon, L., & Shykoff, J. A. (2008). Trade-off between latent period and  
599 transmission success of a plant pathogen revealed by phenotypic  
600 correlations. *Evolutionary Ecology Research*, *10*(6), 913-924.
- 601 Jaenike, J. (1990). Host specialization in phytophagous insects. *Annual Review of Ecology and*  
602 *Systematics*, *21*(1), 243-273.

- 603 Karisto, P., Hund, A., Yu, K., Anderegg, J., Walter, A., Mascher, F., ... & Mikaberidze, A.  
604 (2018). Ranking quantitative resistance to *Septoria tritici* blotch in elite wheat cultivars  
605 using automated image analysis. *Phytopathology*, *108*(5), 568-581.
- 606 Kassen, R. (2002). The experimental evolution of specialists, generalists, and the maintenance  
607 of diversity. *Journal of evolutionary biology*, *15*(2), 173-190.
- 608 Kawecki, T. J. (1994). Accumulation of deleterious mutations and the evolutionary cost of  
609 being a generalist. *The American Naturalist*, *144*(5), 833-838.
- 610 Kelm, C., Ghaffary, S. M. T., Bruelheide, H., Röder, M. S., Miersch, S., Weber, W. E., ... &  
611 Saal, B. (2012). The genetic architecture of seedling resistance to *Septoria tritici* blotch  
612 in the winter wheat doubled-haploid population Solitär× Mazurka. *Molecular*  
613 *Breeding*, *29*(3), 813-830.
- 614 Kirchner, J. W., & Roy, B. A. (2002). Evolutionary implications of host–pathogen specificity:  
615 fitness consequences of pathogen virulence traits. *Evolutionary ecology research*, *4*(1),  
616 27-48.
- 617 Lannou, C. (2012). Variation and selection of quantitative traits in plant pathogens. *Annual*  
618 *review of phytopathology*, *50*.
- 619 Leggett, H. C., Buckling, A., Long, G. H., & Boots, M. (2013). Generalism and the evolution  
620 of parasite virulence. *Trends in ecology & evolution*, *28*(10), 592-596.
- 621 Legros, M., & Koella, J. C. (2010). Experimental evolution of specialization by a  
622 microsporidian parasite. *BMC evolutionary biology*, *10*(1), 159.
- 623 Lendenmann, M. H., Croll, D., Stewart, E. L., & McDonald, B. A. (2014). Quantitative trait  
624 locus mapping of melanization in the plant pathogenic fungus *Zymoseptoria tritici*. *G3:*  
625 *Genes, Genomes, Genetics*, *4*(12), 2519-2533.
- 626 Lenski, R. E., & May, R. M. (1994). The evolution of virulence in parasites and pathogens:  
627 reconciliation between two competing hypotheses. *Journal of theoretical*  
628 *biology*, *169*(3), 253-265.
- 629 Lenth, R., Singmann, H., & Love, J. (2018). Emmeans: Estimated marginal means, aka least-  
630 squares means. *R package version*, *1*(1).
- 631 Linde, C. C., Zhan, J., & McDonald, B. A. (2002). Population structure of *Mycosphaerella*  
632 *graminicola*: from lesions to continents. *Phytopathology*, *92*(9), 946-955.
- 633 May, R. M., & Anderson, R. M. (1983). Epidemiology and genetics in the coevolution of  
634 parasites and hosts. *Proceedings of the Royal society of London. Series B. Biological*  
635 *sciences*, *219*(1216), 281-313.

- 636 McDonald, B. A. (2014). Using dynamic diversity to achieve durable disease resistance in  
637 agricultural ecosystems. *Tropical Plant Pathology*, 39(3), 191-196.
- 638 McDonald, B. A., & Linde, C. (2002). Pathogen population genetics, evolutionary potential,  
639 and durable resistance. *Annual review of phytopathology*, 40(1), 349-379.
- 640 McDonald, B. A., & Stukenbrock, E. H. (2016). Rapid emergence of pathogens in agro-  
641 ecosystems: global threats to agricultural sustainability and food  
642 security. *Philosophical Transactions of the Royal Society B: Biological  
643 Sciences*, 371(1709), 20160026.
- 644 Meile, L., Croll, D., Brunner, P. C., Plissonneau, C., Hartmann, F. E., McDonald, B. A., &  
645 Sánchez-Vallet, A. (2018). A fungal avirulence factor encoded in a highly plastic  
646 genomic region triggers partial resistance to septoria tritici blotch. *New  
647 Phytologist*, 219(3), 1048-1061.
- 648 Pagán, I., Alonso-Blanco, C., & García-Arenal, F. (2007). The relationship of within-host  
649 multiplication and virulence in a plant-virus system. *PLoS One*, 2(8).
- 650 Pariaud, B., Ravigné, V., Halkett, F., Goyeau, H., Carlier, J., & Lannou, C. (2009).  
651 Aggressiveness and its role in the adaptation of plant pathogens. *Plant  
652 Pathology*, 58(3), 409-424.
- 653 Poisot, T., Canard, E., Mouquet, N., & Hochberg, M. E. (2012). A comparative study of  
654 ecological specialization estimators. *Methods in Ecology and Evolution*, 3(3), 537-544.
- 655 R Core Team (2019). R: A language and environment for statistical computing. R Foundation  
656 for Statistical Computing, Vienna, Austria. URL <https://www.R-project.org/>.
- 657 Remold, S. (2012). Understanding specialism when the jack of all trades can be the master of  
658 all. *Proceedings of the Royal Society B: Biological Sciences*, 279(1749), 4861-4869.
- 659 Restif, O., & Koella, J. C. (2003). Shared control of epidemiological traits in a coevolutionary  
660 model of host-parasite interactions. *The American Naturalist*, 161(6), 827-836.
- 661 Roff, D. A. (2012). *Evolutionary quantitative genetics*. Springer Science & Business Media
- 662 Romero, P. A., & Elena, S. F. (2008). The degree of plant resilience to infection correlates with  
663 virus virulence and host-range. *Spanish Journal of Agricultural Research*, 6(S1), 160-  
664 169.
- 665 de Roode, J. C., Yates, A. J., & Altizer, S. (2008). Virulence-transmission trade-offs and  
666 population divergence in virulence in a naturally occurring butterfly  
667 parasite. *Proceedings of the National Academy of Sciences*, 105(21), 7489-7494.
- 668 Sacristan, S., & García-Arenal, F. (2008). The evolution of virulence and pathogenicity in  
669 plant pathogen populations. *Molecular plant pathology*, 9(3), 369-384.

- 670 Salvaudon, L., Héraudet, V., & Shykoff, J. A. (2007). Genotype-specific interactions and the  
671 trade-off between host and parasite fitness. *BMC Evolutionary Biology*, 7(1), 189.
- 672 Stearns, S. C. (1989). Trade-offs in life-history evolution. *Functional ecology*, 3(3), 259-268.
- 673 Stewart, E. L., Croll, D., Lendenmann, M. H., Sanchez-Vallet, A., Hartmann, F. E., Palma-  
674 Guerrero, J., ... & McDonald, B. A. (2018). Quantitative trait locus mapping reveals  
675 complex genetic architecture of quantitative virulence in the wheat pathogen  
676 *Zymoseptoria tritici*. *Molecular plant pathology*, 19(1), 201-216.
- 677 Tack, A. J. M., Thrall, P. H., Barrett, L. G., Burdon, J. J., & Laine, A. L. (2012). Variation in  
678 infectivity and aggressiveness in space and time in wild host–pathogen systems: causes  
679 and consequences. *Journal of evolutionary biology*, 25(10), 1918-1936.
- 680 Thrall, P. H., & Burdon, J. J. (2003). Evolution of virulence in a plant host-pathogen  
681 metapopulation. *Science*, 299(5613), 1735-1737.
- 682 Thrall, P. H., Barrett, L. G., Burdon, J. J., & Alexander, H. M. (2005). Variation in pathogen  
683 aggressiveness within a metapopulation of the *Cakile maritima*–*Alternaria brassicicola*  
684 host–pathogen association. *Plant pathology*, 54(3), 265-274.
- 685 Vale, P. F., Wilson, A. J., Best, A., Boots, M., & Little, T. J. (2011). Epidemiological,  
686 evolutionary, and coevolutionary implications of context-dependent parasitism. *The*  
687 *American Naturalist*, 177(4), 510-521.
- 688 Walsh, B., & Blows, M. W. (2009). Abundant genetic variation+ strong selection= multivariate  
689 genetic constraints: a geometric view of adaptation. *Annual Review of Ecology,*  
690 *Evolution, and Systematics*, 40, 41-59.
- 691 Yang, L., Gao, F., Shang, L., Zhan, J., & McDonald, B. A. (2013). Association between  
692 virulence and triazole tolerance in the phytopathogenic fungus *Mycosphaerella*  
693 *graminicola*. *PLoS One*, 8(3).
- 694 Yates, S., Mikaberidze, A., Krattinger, S. G., Abrouk, M., Hund, A., Yu, K., ... & Karisto, P.  
695 (2019). Precision phenotyping reveals novel loci for quantitative resistance to septoria  
696 tritici blotch. *Plant Phenomics*, 2019, 3285904.
- 697 Zhan, J., & McDonald, B. A. (2013). Field-based experimental evolution of three cereal  
698 pathogens using a mark–release–recapture strategy. *Plant Pathology*, 62, 106-114.
- 699 Zhan, J., Linde, C. C., Jürgens, T., Merz, U., Steinebrunner, F., & McDonald, B. A. (2005).  
700 Variation for neutral markers is correlated with variation for quantitative traits in the  
701 plant pathogenic fungus *Mycosphaerella graminicola*. *Molecular Ecology*, 14(9),  
702 2683-2693.

703 Zhan, J., Thrall, P. H., Papaïx, J., Xie, L., & Burdon, J. J. (2015). Playing on a pathogen's  
704 weakness: using evolution to guide sustainable plant disease control strategies. *Annual*  
705 *review of phytopathology*, 53, 19-43.

706 Zhong, Z., Marcel, T. C., Hartmann, F. E., Ma, X., Plissonneau, C., Zala, M., ... & Amsellem,  
707 J. (2017). A small secreted protein in *Zymoseptoria tritici* is responsible for avirulence  
708 on wheat cultivars carrying the *Stb6* resistance gene. *New Phytologist*, 214(2), 619-631.

709  
710  
711  
712  
713  
714  
715  
716  
717  
718  
719  
720  
721  
722  
723  
724  
725  
726  
727  
728  
729  
730

### 731 **Figures legends**

732 **Figure 1.** Multiple comparisons for (A) virulence (amount of necrotic lesion area) and (B)  
733 reproduction (pycnidia density within lesions) among the five *Zymoseptoria tritici*  
734 populations on 12 wheat hosts. Data were log-transformed.

735

736 **Figure 2.** Correlation between virulence (amount of necrotic lesion area) and reproduction  
737 (pycnidia density within lesions; A) overall and (B) within each population, among 145  
738 *Zymoseptoria tritici* isolates from five populations. Each point represents the overall  
739 mean of virulence and reproduction combined over 12 hosts. Data were log-  
740 transformed.

741

742 **Figure 3.** Correlation between (A) overall mean virulence (amount of necrotic lesion area)  
743 and reproduction specialization, (B) overall reproduction (pycnidia density within  
744 lesions) and virulence specialization among 145 *Zymoseptoria tritici* isolates from five  
745 populations. Specialization represents the estimates of coefficient of variation of  
746 means across 12 hosts for each trait. Higher specialization indicates preference for  
747 specific hosts to maximize trait performance. Data were log-transformed.

748

749 **Figure 4.** Correlation between maximum reproduction (maximum pycnidia density within  
750 the lesion area produced by each isolate across 12 hosts) and reproduction  
751 specialization (measured as the coefficient of variation of means for pycnidia density  
752 within lesions across 12 hosts) among 145 *Zymoseptoria tritici* isolates from five  
753 populations. Data were log-transformed.



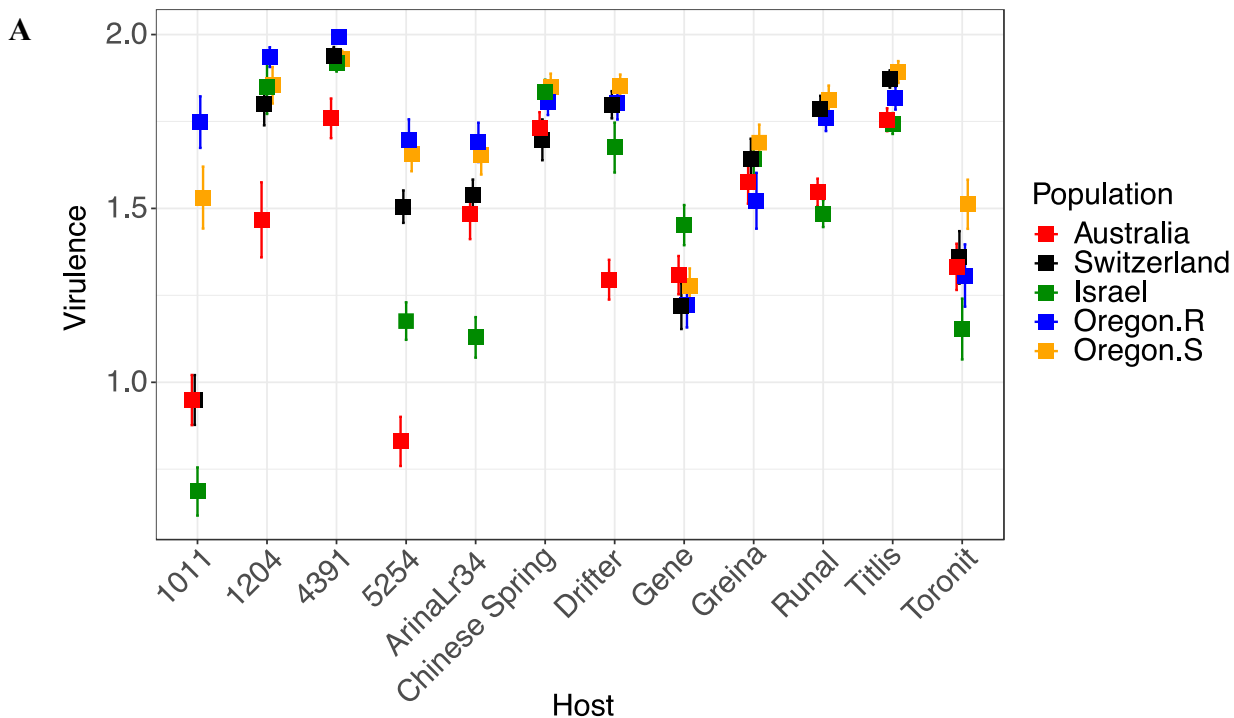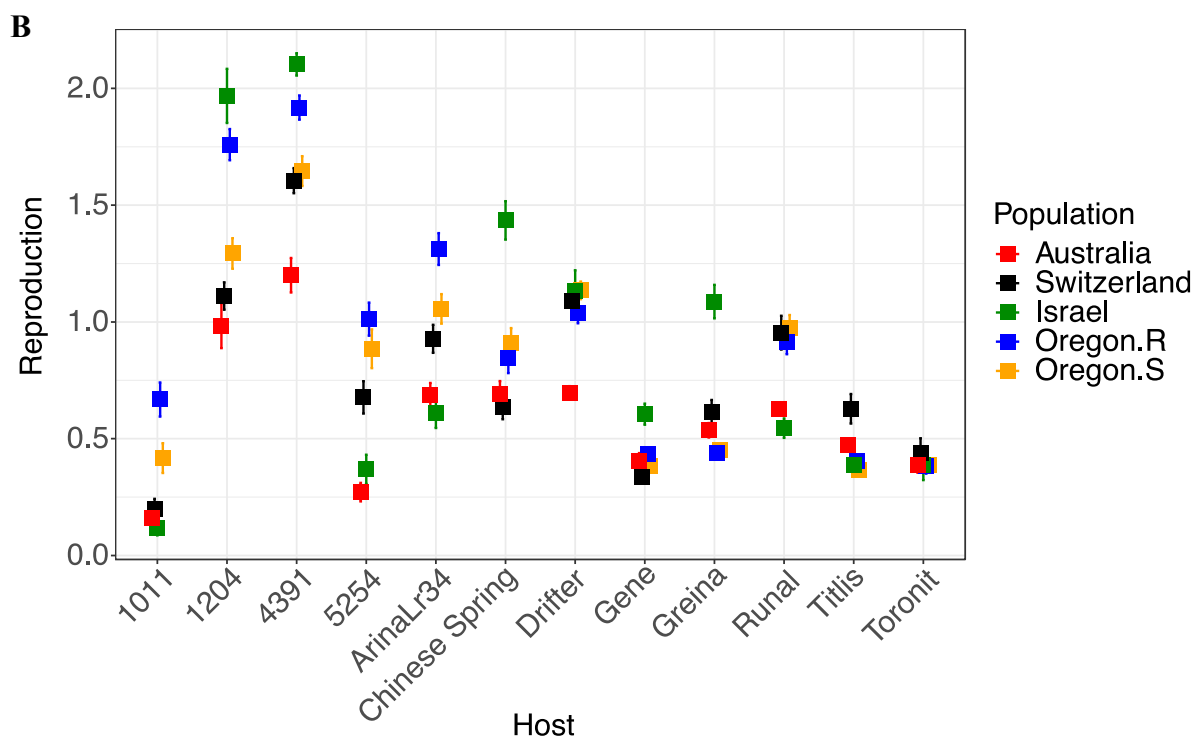

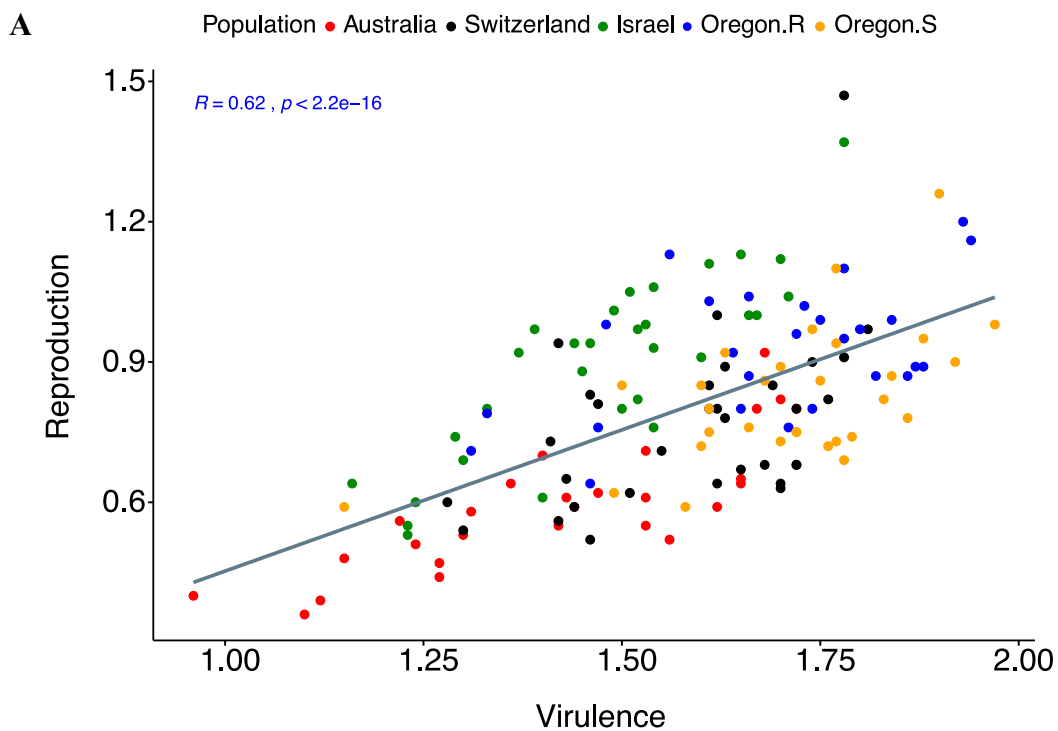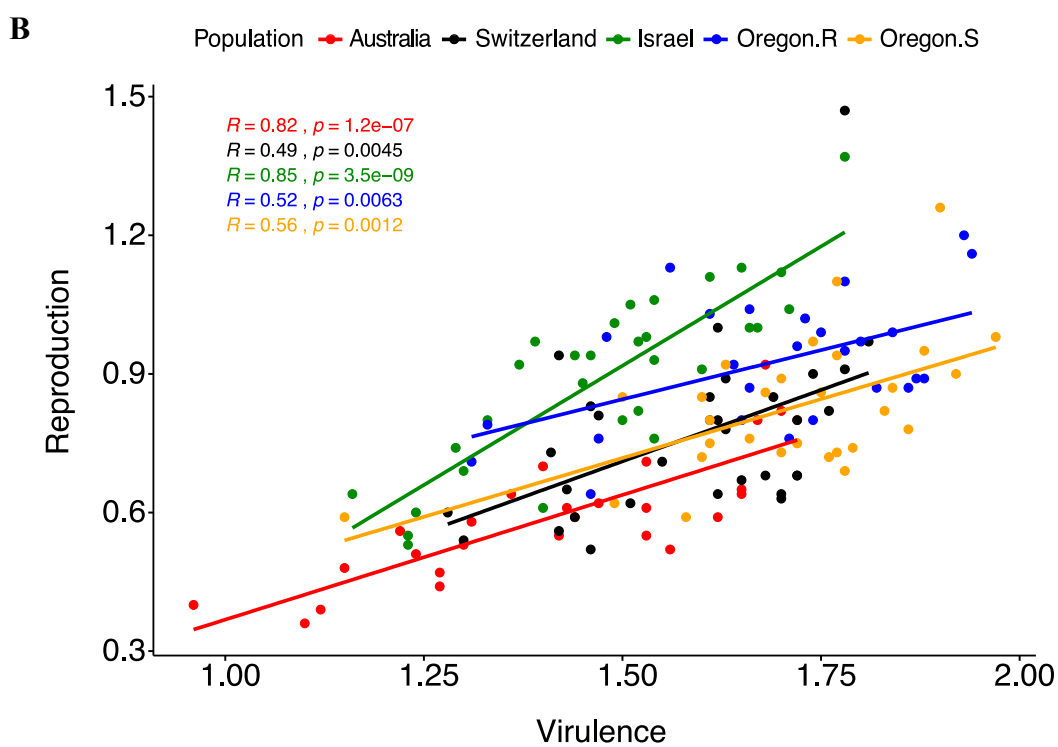

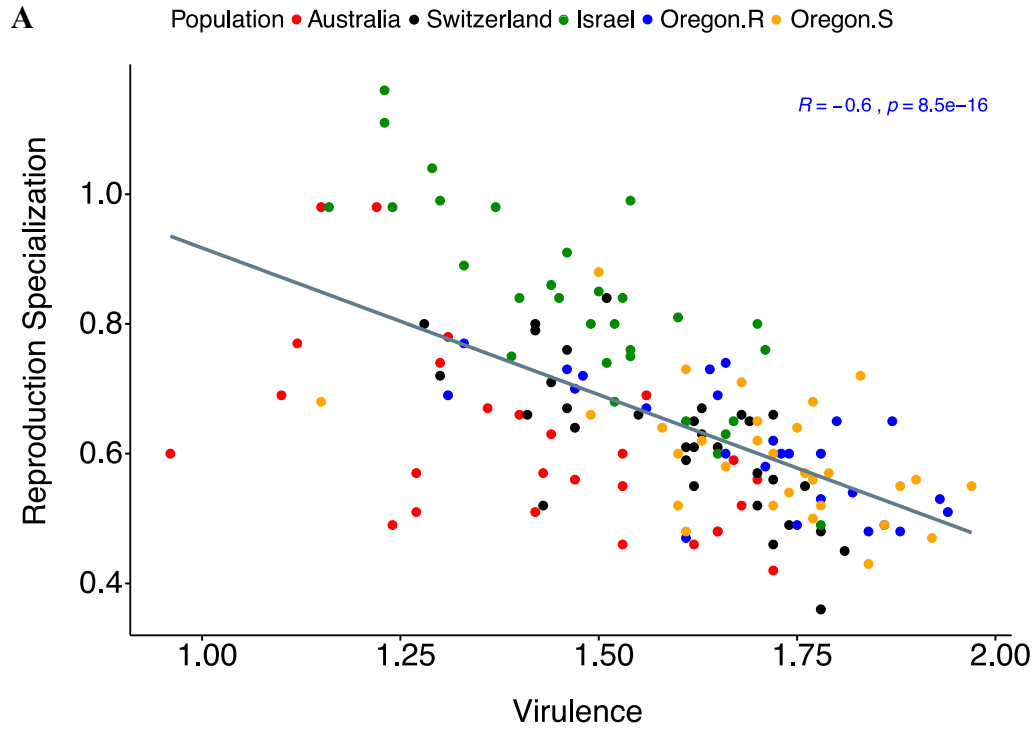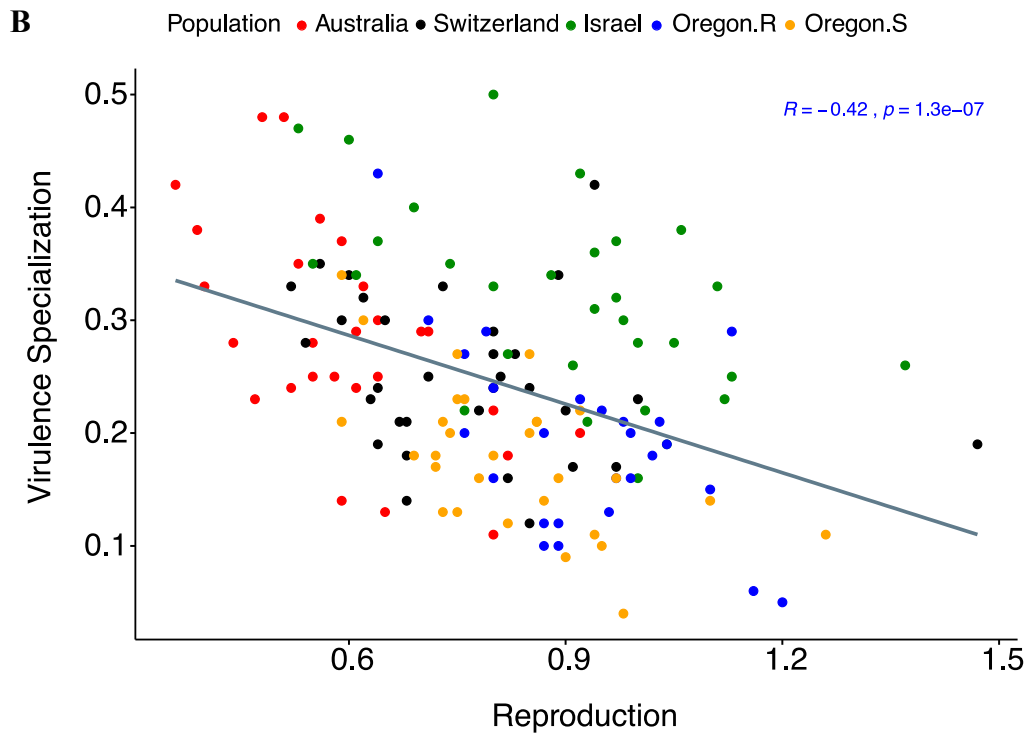

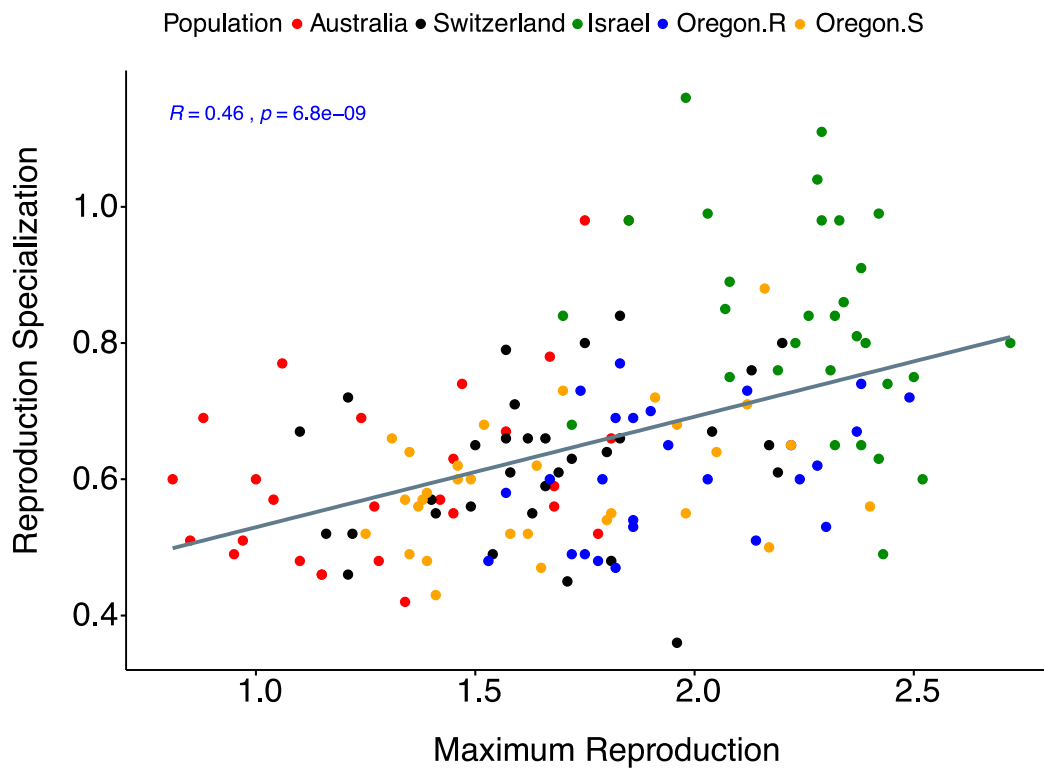

Source: https://www.biorxiv.org/content/10.1101/2020.04.15.043208v1.full.pdf
